# Supplementary material for: Mandated reporters’ experiences with reporting child maltreatment: a meta-synthesis of qualitative studies
Source: PubMed Central journal article supplement — BMJ Open. 2017 Oct 16;7(10):e013942. doi: 10.1136/bmjopen-2016-013942 (PMC5652515; doi:10.1136/bmjopen-2016-013942), 2017-10-16
Supplement: bmjopen-2016-013942supp003.pdf [file bmjopen-2016-013942supp003.pdf]

## Example Search Strategy

Database: Ovid MEDLINE(R) In-Process & Other Non-Indexed Citations, Ovid MEDLINE(R) Daily and Ovid MEDLINE(R) <1946 to Present>

Search Strategy:

- 
- 1 Mandatory Reporting/ (2710)
  - 2 exp Child Abuse/lj [Legislation & Jurisprudence] (2891)
  - 3 Incest/lj [Legislation & Jurisprudence] (88)
  - 4 or/2-3 (2926)
  - 5 limit 4 to yr="1860 - 1997" (1465)
  - 6 (report\* or tell or duty or duties or obligat\* or require\* or protect\* or CPS or investigation? or inquiry or inquiries).tw. (4943274)
  - 7 5 and 6 (535)
  - 8 ((mandate? or mandatory) adj5 report\*).mp. (4068)
  - 9 ((duty or duties or failure or obligat\* or require\* or responsibility or responsibilities or law? or "child protect\*" or CPS or investigation? or inquiry or inquires) adj5 report\*).tw. (29695)
  - 10 (failure adj5 (protect\* or comply)).tw. (1855)
  - 11 must report.tw. (139)
  - 12 reasonable suspicion.tw. (65)
  - 13 or/1,7-12 (35565)
  - 14 exp Child Abuse/ or Shaken Baby Syndrome/ or Incest/ or exp Child Welfare/ or Infant Welfare/ (54722)
  - 15 ((child\* or girl? or boy? or infant\* or baby or babies or toddler\* or preschool\* or pre-school\* or pre school\* or young person or young people or minor? or teen\* or adolescen\* or youth\* or preteen\* or tween\* or kid? or son or sons or daughter? or grandchild\* or grandson? or granddaughter?) adj5 (abuse? or abusing or maltreat\* or neglect\* or abandon\* or harm\* or offence? or offens\* or assault\* or rape? or raping or molest\* or exploit\* or spank\* or hit or hitting or hits or (sex\* adj2 abus\*))).tw. (29293)
  - 16 (parent\* adj3 (violen\* or aggression\* or aggressive\* or harsh\*)).tw. (1324)
  - 17 (child\* adj3 (welfare or aid)).tw. (3562)
  - 18 (child\* protect\* adj3 (service? or agenc\* or organi?ation?)).tw. (941)
  - 19 or/14-18 (70709)
  - 20 battered women/ or domestic violence/ or spouse abuse/ (12077)
  - 21 ((spous\* or partner?? or wife or wives or husband? or family or families or domestic\* or intimate\* or conjugal\* or marital\* or interparent\* or interpartner\*) adj3 (abus\* or violen\* or batter or battered or batters or batterer? or battering or harm or harms or harmed or harming or harmful\* or exploit\* or victim\* or mistreat\* or maltreat\*)).tw. (13612)
  - 22 or/20-21 (17778)
  - 23 (expose\* or exposure or witnes\*).mp. (930487)
  - 24 growing up.tw. (1747)
  - 25 ((child\* or adolesc\*) adj3 "living with").tw. (1328)
  - 26 ((child\* or adolesc\*) adj5 (violen\* adj2 (home\*1 or household\*))).tw. (37)
  - 27 ((child\* or adolesc\*) adj5 (domestic\* adj2 violen\*)).tw. (484)
  - 28 or/23-27 (933477)
  - 29 22 and 28 (2596)
  - 30 19 or 29 (72149)
  - 31 13 and 30 (1796)
