# Supplementary material for: Mandated reporters’ experiences with reporting child maltreatment: a meta-synthesis of qualitative studies
Source: PubMed Central journal article supplement — BMJ Open. 2017 Oct 16;7(10):e013942. doi: 10.1136/bmjopen-2016-013942 (PMC5652515; doi:10.1136/bmjopen-2016-013942), 2017-10-16
Supplement: bmjopen-2016-013942supp005.pdf [file bmjopen-2016-013942supp005.pdf]

| Study and participant characteristics for included articles |                                                                                                                                                                                       |                                                                                                                                     |                                   |                                         |                                                                                                                                                                                                  |                                                      |         |
|-------------------------------------------------------------|---------------------------------------------------------------------------------------------------------------------------------------------------------------------------------------|-------------------------------------------------------------------------------------------------------------------------------------|-----------------------------------|-----------------------------------------|--------------------------------------------------------------------------------------------------------------------------------------------------------------------------------------------------|------------------------------------------------------|---------|
|                                                             | Study Characteristics                                                                                                                                                                 |                                                                                                                                     |                                   | Participant Characteristics             |                                                                                                                                                                                                  |                                                      | Country |
| Article                                                     | Objective                                                                                                                                                                             | Method;<br>Participant<br>sampling<br>strategy                                                                                      | Theories<br>informing<br>analysis | Sample                                  | Context                                                                                                                                                                                          | Age/Experience                                       |         |
| Liou et al. [1],<br>2016                                    | To determine the factors which affect the decision of special education teachers' in Taiwan to file a report when confronted with a case of sexual victimization among their students | Individual interviews; participants responded to a notice on Facebook or PPT, which is a well-known bulletin board system in Taiwan | Thematic analysis                 | 12 teachers                             | Some worked at special education schools; others worked at various school levels, including elementary schools, junior high schools, and senior high schools; some held administrative positions | 30 to 44 years old (6 to 20 years of experience)     | Taiwan  |
| Skarsaune et al. [2], 2016                                  | To describe the nurses' experiences when they had suspected child abuse in their encounters with children and their families in various health care contexts                          | Individual, semi-structure interviews; strategic selection                                                                          | Qualitative content analysis      | 8 nurses                                | Hospital, various units                                                                                                                                                                          | 35 to 60 years old (all over 10 years of experience) | Norway  |
| Tiyyagura et al. [3], 2015                                  | To understand general ED providers'                                                                                                                                                   | One-to-one semi-structured                                                                                                          | Grounded theory                   | 29 mandated reporters (9 physicians, 16 | Emergency Departments, Hospitals                                                                                                                                                                 | (physician's median experience was                   | U.S.    |

|                            |                                                                                                                |                                                                                                                                                                                                                                                                 |                                                               |                                                                                                                                                |            |                                                   |         |
|----------------------------|----------------------------------------------------------------------------------------------------------------|-----------------------------------------------------------------------------------------------------------------------------------------------------------------------------------------------------------------------------------------------------------------|---------------------------------------------------------------|------------------------------------------------------------------------------------------------------------------------------------------------|------------|---------------------------------------------------|---------|
|                            | experiences with child abuse and neglect                                                                       | interviews; purposive sampling and snowball sampling                                                                                                                                                                                                            |                                                               | nurses, 4 physician assistants)                                                                                                                |            | 7 years, nurses median experience was 12.5 years) |         |
| Ellonen et al.[4], 2014    | To study the institutional processes of identifying, responding to and reporting abuse experienced by children | Interviews; participants were randomly selected from document data from authorities, such as data about who made notifications                                                                                                                                  | Thematic analysis (Coffey and Atkinson)                       | 33 mandated reporters (9 police officers, 11 social workers, 9 doctors, and 4 school and day care personnel)                                   | Not stated | Not stated                                        | Finland |
| Gallagher-Mackay [5], 2014 | To analyze decision making by educators about reporting child abuse and neglect                                | Interviews; parents with recently closed children's aid cases were recruited first and then aid workers and teachers associated with their case were recruited. 'Unlinked' teachers, principals, aid workers, and leaders from both groups were also recruited. | Institutional ethnography, grounded theory, regulatory theory | 49 mandated reporters (10 teachers, 8 family service workers, 6 school principals, 6 student support workers, and 19 'leaders' in these areas) | Various    | Not stated                                        | Canada  |

|                          |                                                                                                                                                                                                                                                                                                                                                         |                                                                     |                                      |                                                             |                                                                                                                                                                                                                                |                                                                      |        |
|--------------------------|---------------------------------------------------------------------------------------------------------------------------------------------------------------------------------------------------------------------------------------------------------------------------------------------------------------------------------------------------------|---------------------------------------------------------------------|--------------------------------------|-------------------------------------------------------------|--------------------------------------------------------------------------------------------------------------------------------------------------------------------------------------------------------------------------------|----------------------------------------------------------------------|--------|
| Itzhaky et al. [6], 2014 | To examine the impact of an intensive training program for hospital-pediatricians in identifying and treating young victims of abuse or neglect and how this training impacted cooperation between pediatricians and social workers, seeking to determine whether the doctors' increased familiarity with the social work profession enhanced team-work | In person, semi-structured, in-depth interviews; purposive sampling | Phenomenological approach            | 32 mandated reporters (18 pediatricians, 14 social workers) | Physicians worked in various capacities (first-year interns, directors of children's wards, directors of children's emergency wards, and specialists); social workers worked in children's wards or children's emergency wards | (physicians not stated; social workers 1-20 years of experience)     | Israel |
| Kraft et al. [7], 2014   | To explore how school nurses detect maltreated children and initiate support measures                                                                                                                                                                                                                                                                   | Focus groups; strategic sampling                                    | Grounded theory                      | 23 school nurses                                            | Worked in various municipalities and with various age groups                                                                                                                                                                   | 46 to 57 years of age (3 to 38 years of experience as school nurses) | Sweden |
| Kvist et al. [8], 2014   | To examine what factors cause specialists in pediatric dentistry                                                                                                                                                                                                                                                                                        | Focus groups; specialists and postgraduates from the                | Thematic analysis (Braun and Clarke) | 19 specialists and postgraduate students in                 | Unclear                                                                                                                                                                                                                        | Not stated                                                           | Sweden |

|                                |                                                                                                                                                                                                                                         |                                                                                                                                                                         |                                                                         |                                                                                                                                                                    |                                                                                                                                                        |                                                                                                                                                                                    |           |
|--------------------------------|-----------------------------------------------------------------------------------------------------------------------------------------------------------------------------------------------------------------------------------------|-------------------------------------------------------------------------------------------------------------------------------------------------------------------------|-------------------------------------------------------------------------|--------------------------------------------------------------------------------------------------------------------------------------------------------------------|--------------------------------------------------------------------------------------------------------------------------------------------------------|------------------------------------------------------------------------------------------------------------------------------------------------------------------------------------|-----------|
|                                | to suspect child abuse or neglect and to determine what considerations influence the decision to report these suspicions to social services                                                                                             | Swedish Academy of Pediatric Dentistry and others told by them (snowball) were invited. Participants were 'strategically selected' from this sample.                    |                                                                         | pediatric dentistry                                                                                                                                                |                                                                                                                                                        |                                                                                                                                                                                    |           |
| Svard et al. [9], 2014         | To explore how hospital social workers describe assessment processes for children at risk at their inter-professional workplaces                                                                                                        | Semi-structured interviews; not stated                                                                                                                                  | First-stage analysis (Gillham, 2005) and content analysis (Kvale, 2009) | 14 social workers                                                                                                                                                  | Inpatient wards, children's hospitals or pediatric wards                                                                                               | (6 months to 30 years of experience)                                                                                                                                               | Sweden    |
| Zannettino et al. [10], (2014) | To examine how and in what ways child protection and domestic violence workers conceptualise and respond to children and families affected by domestic violence, and how do they consider that their service sectors could operate more | Focus groups; surveys were offered to workers from child protection authorities and from domestic violence agencies and respondents were invited to attend focus groups | Unclear                                                                 | Total number of mandated reporters unclear (14 child protection workers, 16 domestic violence workers, and a mix of the two groups (n=20) in a second focus group) | Child protection or domestic violence workers whose offices were located in one of the most socially and economically disadvantaged areas in Australia | (most child protection workers had less than 2 years of experience; domestic violence workers had a range of experience from "new graduates" to those who had worked "many years") | Australia |

|                           |                                                                                                                                                            |                                                                                                                                        |                                                       |                |                                                  |                                                        |             |
|---------------------------|------------------------------------------------------------------------------------------------------------------------------------------------------------|----------------------------------------------------------------------------------------------------------------------------------------|-------------------------------------------------------|----------------|--------------------------------------------------|--------------------------------------------------------|-------------|
|                           | collaboratively as a means to improve service responses                                                                                                    |                                                                                                                                        |                                                       |                |                                                  |                                                        |             |
| Angelo et al. [11], 2013  | To understand the experience of the nurses in their care of child victims of domestic violence, in pediatric emergency, intensive care and inpatient units | Semi-structured interviews; snowball sampling                                                                                          | Theoretical-methodology consistent with phenomenology | 15 nurses      | Nurses working in pediatric inpatient care units | 27 to 48 years of age (3 to 12 years since graduation) | Brazil      |
| Hurtado et al. [12], 2013 | To assess experiences and barriers associated with teaching child sexual abuse prevention and with reporting child sexual abuse                            | Focus groups; teachers and students attended a child sexual abuse exhibit and some of these teachers were included in the focus groups | Not stated                                            | 19 teachers    | Unclear                                          | Unclear                                                | El Salvador |
| Lee et al. [13], 2013     | To learn first-hand from CPS workers how CPS investigations could be improved                                                                              | Focus groups; voluntary sample from Department of Human Services offices in a Midwestern state                                         | Manual content coding                                 | 39 CPS workers | Urban Department of Human Service workers        | Not stated                                             | U.S.        |

|                           |                                                                                                                                      |                                                                                                                                                         |                   |                                                                                                                                            |                                                                                 |                                                      |              |
|---------------------------|--------------------------------------------------------------------------------------------------------------------------------------|---------------------------------------------------------------------------------------------------------------------------------------------------------|-------------------|--------------------------------------------------------------------------------------------------------------------------------------------|---------------------------------------------------------------------------------|------------------------------------------------------|--------------|
| Phasha [14]<br>2013       | To investigate influences on under-reporting of sexual abuse involving teenagers with intellectual disability and the reason thereof | Individual interviews and focus groups; convenience sampling and theoretical sampling                                                                   | Thematic analysis | 32 mandated reporters (18 teachers, 6 staff caregivers, 2 psychologists, 3 social workers, 2 school nurses, 1 speech language pathologist) | Special schools catering specifically for learners with intellectual disability | Unclear                                              | South Africa |
| Davidov et al. [15], 2012 | To identify and describe issues related to mandatory reporting within the context of Nurse Family Partnership (NFP) home visitation  | Two consecutive focus groups; all nurses who reported home visiting abused NFP clients were invited (4 sites from all NFP sites were included in study) | Content analysis  | Total number of mandated reporters unclear (23 nurses in first focus group and 25 nurses in second focus group)                            | Nurses working in the NFP home visitation program                               | Mean age of 46.2 years (5 to 38 years of experience) | U.S.         |
| Feng et al. [16], 2012    | To understand the ethical and legal challenges of reporting child abuse                                                              | Structured interviews; purposive, snowball sampling                                                                                                     | Grounded theory   | 18 mandated reporters (4 social workers, 3 physicians, 6 nurses, and 5 teachers)                                                           | Social workers: 3 worked in hospitals, 1 worked for CPS                         | 28 to 53 years old (3 to 27 years of practice)       | Taiwan       |
| Francis et al. [17], 2012 | To understanding the circumstances and thence the decision-making processes of mandated professionals employed in rural communities  | Face to face or phone interviews; advertisements in regional newspapers, followed by snowball sampling                                                  | Grounded theory   | 17 mandated reporters (1 medical practitioner, 7 nurses, 3 police officers, 6 teachers)                                                    | Rural region, but not otherwise stated                                          | Not stated                                           | Australia    |

|                            |                                                                                                                                                                                                  |                                                                                            |                                                                                      |                                                                                                                                                                                                                  |                               |            |        |
|----------------------------|--------------------------------------------------------------------------------------------------------------------------------------------------------------------------------------------------|--------------------------------------------------------------------------------------------|--------------------------------------------------------------------------------------|------------------------------------------------------------------------------------------------------------------------------------------------------------------------------------------------------------------|-------------------------------|------------|--------|
| Mallén [18], 2011          | To discuss why some cases of abuse and neglect of disabled children are considered difficult to report by the Child and Youth Habilitation Services                                              | Individual and group semi-structured interviews                                            | Not stated                                                                           | 14 mandated reporters (all staff were Youth and Rehabilitation Service Workers, including psychologists, social workers, speech therapists, nurses, paediatricians, and divisional heads)                        | Not stated                    | Not stated | Sweden |
| Panayiotopoulos [19], 2011 | To describe and understand on the one hand the importance of mandatory reporting through the professionals' lens and on the other hand to consider the obstacles to its effective implementation | In depth, semi-structured interviews with individuals or groups; sampling strategy unclear | Process evaluation (Riger)                                                           | Total numbers of MRs sampled unclear (educational psychologists from two districts, 10 school teachers, 11 family social workers, he previous and current public prosecutor responsible for mandatory reporting) | Various                       | Not stated | Cyprus |
| Sege et al. [20], 2011     | To examine the validity of primary health care providers' assessment of suspicion that an                                                                                                        | Telephone interviews; stratified sampling of primary health care providers                 | Formal qualitative analysis of themes obtained from the interviews was not performed | 110 physicians                                                                                                                                                                                                   | Primary health care providers | Not stated | U.S.   |

|                           |                                                                                                                                                                                                |                                                                                                                    |                                                 |                                                                                  |                                                                                                      |                                                                   |        |
|---------------------------|------------------------------------------------------------------------------------------------------------------------------------------------------------------------------------------------|--------------------------------------------------------------------------------------------------------------------|-------------------------------------------------|----------------------------------------------------------------------------------|------------------------------------------------------------------------------------------------------|-------------------------------------------------------------------|--------|
|                           | injury was caused by child abuse and their decision to report suspected child abuse to child protective services                                                                               | from the CARES study by level of suspicion and reporting decisions                                                 |                                                 |                                                                                  |                                                                                                      |                                                                   |        |
| Eisbach et al. [21], 2010 | To (a) describe the process of reporting child maltreatment from the perspective of pediatric nurses and (b) gain insight into mediating and/or moderating influences on the reporting process | In person or phone interviews; maximum variation sampling of nurses from 3 statewide nursing organizations in Iowa | Grounded theory                                 | 23 nurses                                                                        | 10 school nurses, 7 pediatric nurse practitioners, and 6 pediatric mental health nurse practitioners | (10-41 years nursing experience, 2-40 years pediatric experience) | U.S.   |
| Feng et al. [22], 2010    | To explore the collaborative experiences and perspectives in reporting child abuse of four primary mandated reporting disciplines in Taiwan                                                    | Interviews; purposive sampling of MRs recruited from calls to hospitals, Department of Child Welfare and schools   | Grounded theory                                 | 21 mandated reporters (5 physicians, 5 nurses, 6 social workers, and 5 teachers) | 16 worked directly with children, 5 were administrators                                              | 25-59 years old (3-34 years of experience)                        | Taiwan |
| Chanmugam [23], 2009      | To explore school social workers relationships during instances                                                                                                                                | In-depth face to face or phone semi-structured                                                                     | Ecomapping, thematic analysis (Braun and Clark; | 10 school social workers                                                         | 5 worked in elementary schools, 4 worked in                                                          | (mean 5 years of experience)                                      | U.S.   |



|                         |                                                                                                                                                  |                                                                                                                 |                                 |                                                                                          |                                                                                                                               |                                                   |              |
|-------------------------|--------------------------------------------------------------------------------------------------------------------------------------------------|-----------------------------------------------------------------------------------------------------------------|---------------------------------|------------------------------------------------------------------------------------------|-------------------------------------------------------------------------------------------------------------------------------|---------------------------------------------------|--------------|
|                         | of abuse and neglect reporting, focusing on reports made for children and adolescents already receiving school social work services              | interviews and a focus group; convenience, maximum variation, and snowball sampling techniques                  | Miles and Huberman)             |                                                                                          | middle schools, and 1 worked in high-school                                                                                   |                                                   |              |
| Feng et al. [24], 2009  | To explore kindergarten teachers' experience and perspectives of working with abused children and their families                                 | Focus groups with an interview guide; purposive sampling                                                        | Grounded theory                 | 20 teachers                                                                              | All kindergarten teachers                                                                                                     | 20-45 years old (6 months-32 years of experience) | Taiwan       |
| Phasha [25], 2009       | To describe responses to situations of sexual abuse involving teenagers with intellectual disability                                             | Individual interviews and focus groups; referral and theoretical sampling                                       | Grounded theory                 | 16 mandated reporters (4 police officers, 2 nurses, 4 staff caregivers and 10 educators) | Police officers from the Social Crime and Victim empowerment unit; nurses, caregivers, and educators from the special schools | Not stated                                        | South Africa |
| Jones et al. [26], 2008 | (1) To identify factors clinicians weighed when deciding whether to report injuries they suspected might have been caused by child abuse; (2) to | Structured telephone interviews; subsample of physicians in CARES study were invited to participate based on an | Ethnographic techniques (Jones) | 75 physicians                                                                            | Primary care physicians                                                                                                       | Not stated                                        | U.S.         |

|                        |                                                                                                                                                                                                                        |                                                                                |                         |           |                                                                   |                                             |              |
|------------------------|------------------------------------------------------------------------------------------------------------------------------------------------------------------------------------------------------------------------|--------------------------------------------------------------------------------|-------------------------|-----------|-------------------------------------------------------------------|---------------------------------------------|--------------|
|                        | describe clinicians' management strategies for children with injuries from suspected child abuse that were not reported; and (3) to describe how clinicians explained not reporting high-suspicion injuries            | informative sampling scheme                                                    |                         |           |                                                                   |                                             |              |
| Land et al. [27], 2008 | To investigate if dilemmas arise for nurses in their mandated requirement to report cases of suspected child abuse in the Northern Territory of Australia and in their effectiveness in their role protecting children | Interviews (with semi-structured and open-ended questions); purposive sampling | Manual, thematic coding | 10 nurses | Acute, community and school practice settings                     | Unclear (more than two years of experience) | Australia    |
| Phasha [28], 2008      | To provide a detailed description of participants' perceptions regarding the roles that                                                                                                                                | Snowball sampling                                                              | Not stated              | Unclear   | Teachers involved in guidance or life skills education at primary | Not stated                                  | South Africa |

|                            |                                                                                                                                                                                                                 |                                        |                                               |                          |                                                                                                                                                                                                                                                                              |            |           |
|----------------------------|-----------------------------------------------------------------------------------------------------------------------------------------------------------------------------------------------------------------|----------------------------------------|-----------------------------------------------|--------------------------|------------------------------------------------------------------------------------------------------------------------------------------------------------------------------------------------------------------------------------------------------------------------------|------------|-----------|
|                            | teachers can play in helping learners overcome the negative impact of their experiences of child sexual abuse                                                                                                   |                                        |                                               |                          | schools or high schools                                                                                                                                                                                                                                                      |            |           |
| Tingberg et al. [29], 2008 | To identify nurses' experiences in encountering abused children and their parents                                                                                                                               | Interviews; sampling strategy unclear  | Critical incident technique                   | 11 nurses                | Emergency department nurses from tertiary care children's hospital                                                                                                                                                                                                           | Not stated | Sweden    |
| McLaren [30] 2007          | To report exploratory research into social workers' perceptions and actions regarding "forewarning" clients of their child abuse reporting obligations as a limitation of confidentiality at relationship onset | In-depth interviews; snowball sampling | Discovery approach, phenomenological analysis | 6 social workers         | Social workers from six different welfare agencies that provide both primary and ancillary counselling support services to parents and their families; one each from education, hospital-based health, mental health, family support, domestic violence and refugee services | Not stated | Australia |
| Silva et al. [31], 2007    | To identify and analyze                                                                                                                                                                                         | Semi-structured                        | Dialectic hermeneutics                        | 10 mandated reporters (2 | Not stated                                                                                                                                                                                                                                                                   | Not stated | Brazil    |

|                               |                                                                                                                                                                                                                                |                                     |                                                       |                                                                                                                                                                                                           |                                                                                                        |                                            |        |
|-------------------------------|--------------------------------------------------------------------------------------------------------------------------------------------------------------------------------------------------------------------------------|-------------------------------------|-------------------------------------------------------|-----------------------------------------------------------------------------------------------------------------------------------------------------------------------------------------------------------|--------------------------------------------------------------------------------------------------------|--------------------------------------------|--------|
|                               | notifications of domestic violence against children at the Guarulhos Regional Health Divisions, the limits and gaps in health professionals' actions and the meaning of domestic violence against children in their daily work | interviews; not stated              |                                                       | psychologists, 2 nurses, 2 community health agents, 2 nursing aids and 2 pediatricians)                                                                                                                   |                                                                                                        |                                            |        |
| VanBergeijk et al. [32], 2006 | To analyze the experiences of school personnel who report child abuse along the United States-Mexico border and to add to what is known about Secondary Traumatic Stress (STS) through an exploration of qualitative data      | Face to face interviews; not stated | Grounded theory                                       | 28 school personnel (17 general education teachers, 4 special education teachers, 1 acting administrator, 3 social workers, 2 school psychologists, 1 speech therapist, 1 speech therapist and secretary) | School personnel from San Ysidro and neighboring communities in the bilingual or English-only programs | Unclear                                    | U.S.   |
| Feng et al. [33], 2005        | To explore nurses' experiences and perspectives regarding child abuse in Taiwan                                                                                                                                                | Interviews; purposive sample        | Thematic analysis (Morse & Field) and grounded theory | 18 nurses                                                                                                                                                                                                 | 8 ER nurses and 10 pediatric nurses (all in hospitals)                                                 | 23-46 years old (3-24 years of experience) | Taiwan |

|                               |                                                                                                                                                                    |                                                 |                 |                                                                                                                                                                                                                                        |                                  |                            |           |
|-------------------------------|--------------------------------------------------------------------------------------------------------------------------------------------------------------------|-------------------------------------------------|-----------------|----------------------------------------------------------------------------------------------------------------------------------------------------------------------------------------------------------------------------------------|----------------------------------|----------------------------|-----------|
| Shalhoub-Kevorkian [34], 2005 | To examine the effect of such sociopolitical factors on the sexually abused Palestinian Israeli girl and on the application of the child protection laws in Israel | Focus groups; not stated                        | Not stated      | 20 mandated reporters (3 social workers, 4 heads of social units within the Welfare Department, 6 school counselors, 6 helpers who answer calls to rape crisis hotlines and centers [2 of which were social workers], 1 administrator) | Unclear                          | Not stated                 | Israel    |
| VanBergeijk et al. [35], 2005 | To understand school personnel's experiences reporting child maltreatment                                                                                          | Semistructured interviews; theoretical sampling | Grounded theory | 28 school personnel (17 general education teachers, 4 special education teachers, 1 acting administrator, 3 social workers, 2 school psychologists, 1 speech therapist, 1 secretary)                                                   | Public school personnel          | (2-20 years of experience) | U.S.      |
| Nayda [36], 2002              | To compare the decision making of teachers and nurses in cases of                                                                                                  | Structured interviews;                          | Not stated      | 10 nurses                                                                                                                                                                                                                              | Community child and youth health | Not stated                 | Australia |

|                         | suspected child abuse                                                                                                                                                                                                                                      | purposive sample                                       |                   |                                                                                                                                                                                                                                                                                                                                                                                                                                                                 |         |            |           |
|-------------------------|------------------------------------------------------------------------------------------------------------------------------------------------------------------------------------------------------------------------------------------------------------|--------------------------------------------------------|-------------------|-----------------------------------------------------------------------------------------------------------------------------------------------------------------------------------------------------------------------------------------------------------------------------------------------------------------------------------------------------------------------------------------------------------------------------------------------------------------|---------|------------|-----------|
| Waugh et al. [37], 2002 | To explore possible ways in which child protection practitioners and domestic violence practitioners could work collaboratively to promote the safety, well-being and welfare of children, young people and women who live in domestic violence situations | Individual, semi-structure interviews and focus groups | Thematic analysis | Total number of mandated reporters is unclear (interviews with 14 CPS workers interviews and focus groups with staff from family support services, physical abuse and neglect of children services, the Department of Community Services, child and family teams in community health, women's community legal centres, Relationships Australia, women's housing schemes, child protection teams, early intervention programmes, non-government child protection | Various | Not stated | Australia |

|                            |                                                                                                                                                                                                                                                                                  |                                                            |                   |                                                                               |                                                                    |                                                                                                                                                        |      |
|----------------------------|----------------------------------------------------------------------------------------------------------------------------------------------------------------------------------------------------------------------------------------------------------------------------------|------------------------------------------------------------|-------------------|-------------------------------------------------------------------------------|--------------------------------------------------------------------|--------------------------------------------------------------------------------------------------------------------------------------------------------|------|
|                            |                                                                                                                                                                                                                                                                                  |                                                            |                   | services, specialist domestic violence services and women's migrant services) |                                                                    |                                                                                                                                                        |      |
| Deisz et al. [38], 1996    | To understand the way therapists and child protection workers approach the requirements of mandated reporting and differ in their perspectives of what constitutes a legitimate report, child maltreatment, and the ensuing relationship between the reporter and the CPS worker | Open-ended, semi-structures interviews; convenience sample | Not stated        | 49 mandated reporters (29 therapists and 20 CPS workers)                      | Therapists were from 6 different nonprofit social service agencies | Therapists: Late 20s-early 50s; (recent graduates-over 10 years of experience)<br><br>Child protection workers: not stated; (1-14 years of experience) | U.S. |
| Anderson et al. [39], 1993 | To investigate therapists and child protective workers experiences with reporting in therapeutic relationships                                                                                                                                                                   | Semi-structured interviews;                                | Thematic analysis | 30 psychotherapists and 25 CPS workers                                        | Therapists were from 6 agencies                                    | Therapists: not stated; (new workers-over 10 years of experience)<br><br>Child protective service workers: not stated; not stated                      | U.S. |

|                       |                                                                                                                                        |                                                                                                                                                                                                                     |                                      |                                                                             |                               |                                                       |        |
|-----------------------|----------------------------------------------------------------------------------------------------------------------------------------|---------------------------------------------------------------------------------------------------------------------------------------------------------------------------------------------------------------------|--------------------------------------|-----------------------------------------------------------------------------|-------------------------------|-------------------------------------------------------|--------|
| Tite [40], 1993       | To explore teachers' definitions of abuse and examine the relationship between definitions and intervention                            | Semi-structured interviews (phase 1) followed by survey (phase 2, not included) followed by focused telephone interviews; unclear sampling (phase 1) and random sample of subgroup of survey participants (phase 2) | Qualitative process and pattern data | 10 teachers (phase 1); 8 teachers and 2 principals (phase 2)                | Elementary schools            | Not stated                                            | Canada |
| Anderson [41], 1992   | To explore if mandatory reporting laws are serving therapeutic or anti-therapeutic aims or if they are neutral with respect to therapy | Semi-structured interviews                                                                                                                                                                                          | Thematic analysis                    | 30 psychotherapists who made a report in the previous 12 months on a client | 6 agencies across 2 countries | Not stated; (new workers-over 10 years of experience) | U.S.   |
| Giovannoni [42], 1991 | To study CPS workers' attitudes about reporting, screening, and substantiation of cases as they                                        | Semi-structured interviews; sampling                                                                                                                                                                                | Content analysis                     | 81 CPS workers                                                              | Unclear                       | Not stated                                            | U.S.   |



|                             |                                                                                                                                                                                                                                                                                                                       |                                                                                                                                                                                                            |                               |                                                                                                                            |                                                                   |                                                                  |      |
|-----------------------------|-----------------------------------------------------------------------------------------------------------------------------------------------------------------------------------------------------------------------------------------------------------------------------------------------------------------------|------------------------------------------------------------------------------------------------------------------------------------------------------------------------------------------------------------|-------------------------------|----------------------------------------------------------------------------------------------------------------------------|-------------------------------------------------------------------|------------------------------------------------------------------|------|
|                             | relate to the “unsubstantiated” report                                                                                                                                                                                                                                                                                | strategy unclear                                                                                                                                                                                           |                               |                                                                                                                            |                                                                   |                                                                  |      |
| Barksdale [43], 1989        | To investigate the decision making process of a small sample of psychotherapists who discovered child abuse in their clinical practice, as well as the possible effects of the reporting decision                                                                                                                     | Semi-structured interviews; sampling strategy unclear                                                                                                                                                      | Qualitative, content analysis | 10 psychotherapists                                                                                                        | Psychotherapists were employed in private not-for-profit agencies | Unclear (minimum of 3 years post-masters or doctoral experience) | U.S. |
| Muehleman et al. [44], 1981 | To investigate the reasoning of practicing psychologists in response to a hypothetical child abuse reporting dilemma and to study to study why psychologists make the choices they do (when discovering child abuse in therapy) by examining the relative importance of the issues of life, law, and confidentiality) | Face to face interviews and phone interviews; sampled from participants of the convention of the Tennessee and Kentucky Psychological Associations plus 10 practicing psychologists (sampling unspecified) | Not stated                    | 39 mandated reporters (2 psychology students, 18 psychologists with their masters, 19 with doctoral degrees in psychology) | Unclear                                                           | Not stated                                                       | U.S. |

1. Liou W-Y, Chen L-Y. Special Education Teachers' Perspective on Mandatory Reporting of Sexual Victimization of Students in Taiwan. *Sexuality and Disability* 2016;1-13 doi: 10.1007/s11195-016-9436-x[published Online First: Epub Date]].
2. Skarsaune K, Bondas T. Neglected nursing responsibility when suspecting child abuse. *Clinical Nursing Studies* 2015;**4**(1) doi: 10.5430/cns.v4n1p24[published Online First: Epub Date]].
3. Tiyyagura G, Gawel M, Koziel JR, Asnes A, Bechtel K. Barriers and Facilitators to Detecting Child Abuse and Neglect in General Emergency Departments. *Ann Emerg Med* 2015;**66**(5):447-54 doi: 10.1016/j.annemergmed.2015.06.020[published Online First: Epub Date]].
4. Etlonen N, Pösö T. Hesitation as a System Response to Children Exposed to Violence. *International Journal of Children's Rights* 2014;**22**(4):730-47 doi: 10.1163/15718182-02204001[published Online First: Epub Date]].
5. Gallagher-Mackay K. Teachers' Duty to Report Child Abuse and Neglect and the Paradox of Noncompliance: Relational Theory and 'Compliance' in the Human Services. *Law & Policy* 2014;**36**(3):256-89 doi: 10.1111/lapo.12020[published Online First: Epub Date]].
6. Itzhaky H, Zanbar L. In the Front Line: The Impact of Specialist Training for Hospital Physicians in Children at Risk on Their Collaboration With Social Workers. *Social Work in Health Care* 2014;**53**(7):617-39 23p doi: 10.1080/00981389.2014.921267[published Online First: Epub Date]].
7. Kraft LE, Eriksson U-B. The School Nurse's Ability to Detect and Support Abused Children: A Trust-Creating Process. *The Journal of School Nursing: The Official Publication of the National Association of School Nurses* 2015;**31**(5):353-62 doi: 10.1177/1059840514550483[published Online First: Epub Date]].
8. Kvist T, Wickstrom A, Miglis I, Dahllöf G. The dilemma of reporting suspicions of child maltreatment in pediatric dentistry. *Eur J Oral Sci* 2014;**122**(5):332-8 doi: <http://dx.doi.org/10.1111/eos.12143>[published Online First: Epub Date]].
9. Svärd V. Hospital social workers' assessment processes for children at risk: positions in and contributions to inter-professional teams. *European Journal of Social Work* 2014;**17**(4):508-22 doi: 10.1080/13691457.2013.806296[published Online First: Epub Date]].
10. Zannettino L, McLaren H. Domestic violence and child protection: towards a collaborative approach across the two service sectors. *Child & Family Social Work* 2014;**19**(4):421-31 11p doi: 10.1111/cfs.12037[published Online First: Epub Date]].
11. Angelo M, Prado SI, Cruz AC, Ribeiro MO. Nurses' experiences caring for child victims of domestic violence: a phenomenological analysis. *Texto & Contexto - Enfermagem* 2013;**22**(3):585-92 doi: 10.1590/S0104-07072013000300003[published Online First: Epub Date]].
12. Hurtado A, Katz C, Ciro D, Gutfreund D. Teachers' knowledge, attitudes and experience in sexual abuse prevention education in El Salvador. *Glob Public Health* 2013;**8**(9):1075-86 doi: <http://dx.doi.org/10.1080/17441692.2013.839729>[published Online First: Epub Date]].
13. Lee SJ, Soback JL, Djelaj V, Agius E. When practice and policy collide: Child welfare workers' perceptions of investigation processes. *Children and Youth Services Review* 2013;**35**(4):634-41 doi: <http://dx.doi.org/10.1016/j.childyouth.2013.01.004>[published Online First: Epub Date]].
14. Phasha TN. Influences on under reporting of sexual abuse of teenagers with intellectual disability: Results and implications of a South African study. *Journal of Psychology in Africa* 2013;**23**(4):625-29

15. Davidov DM, Jack SM, Frost SS, Coben JH. Mandatory reporting in the context of home visitation programs: intimate partner violence and children's exposure to intimate partner violence. *Violence Against Women* 2012;**18**(5):595-610 doi: <http://dx.doi.org/10.1177/1077801212453278>[published Online First: Epub Date]].
16. Feng J-Y, Chen Y-W, Fetzer S, Feng M-C, Lin C-L. Ethical and legal challenges of mandated child abuse reporters. *Children and Youth Services Review* 2012;**34**(1):276-80 doi: <http://dx.doi.org/10.1016/j.childyouth.2011.10.026>[published Online First: Epub Date]].
17. Francis K, Chapman Y, Sellick K, et al. The decision-making processes adopted by rurally located mandated professionals when child abuse or neglect is suspected. *Contemp Nurse* 2012;**41**(1):58-69 doi: <http://dx.doi.org/10.5172/conu.2012.41.1.58>[published Online First: Epub Date]].
18. Mallén A. 'It's Like Piecing Together Small Pieces of a Puzzle'. Difficulties in Reporting Abuse and Neglect of Disabled Children to the Social Services. *Journal of Scandinavian Studies in Criminology and Crime Prevention* 2011;**12**(1):45-62 doi: 10.1080/14043858.2011.561622[published Online First: Epub Date]].
19. Panayiotopoulos C. Mandatory reporting of domestic violence cases in Cyprus; barriers to the effectiveness of mandatory reporting and issues for future practice. *European Journal of Social Work* 2011;**14**(3):379-402 24p doi: 10.1080/13691457.2010.490936[published Online First: Epub Date]].
20. Sege R, Flaherty E, Jones R, et al. To report or not to report: examination of the initial primary care management of suspicious childhood injuries. *Academic pediatrics* 2011;**11**(6):460-6 doi: <http://dx.doi.org/10.1016/j.acap.2011.08.005>[published Online First: Epub Date]].
21. Eisbach SS, Driessnack M. Am I sure I want to go down this road? Hesitations in the reporting of child maltreatment by nurses. *J Spec Pediatr Nurs* 2010;**15**(4):317-23 doi: <http://dx.doi.org/10.1111/j.1744-6155.2010.00259.x>[published Online First: Epub Date]].
22. Feng JY, Fetzer S, Chen YW, Yeh L, Huang MC. Multidisciplinary collaboration reporting child abuse: a grounded theory study. *International Journal of Nursing Studies* 2010;**47**(12):1483-90 doi: <http://dx.doi.org/10.1016/j.ijnurstu.2010.05.007>[published Online First: Epub Date]].
23. Chanmugam A. A qualitative study of school social workers' clinical and professional relationships when reporting child maltreatment. *Children & Schools* 2009;**31**(3):145-61 doi: <http://dx.doi.org/10.1093/cs/31.3.145>[published Online First: Epub Date]].
24. Feng J-Y, Chen S-J, Wilk NC, Yang W-P, Fetzer S. Kindergarten teachers' experience of reporting child abuse in Taiwan: Dancing on the edge. *Children and Youth Services Review* 2009;**31**(3):405-09 doi: <http://dx.doi.org/10.1016/j.childyouth.2008.09.007>[published Online First: Epub Date]].
25. Phasha N. Responses to Situations of Sexual Abuse Involving Teenagers with Intellectual Disability. *Sexuality and Disability* 2009;**27**(4):187-203 doi: 10.1007/s11195-009-9134-z[published Online First: Epub Date]].
26. Jones R, Flaherty EG, Binns HJ, et al. Clinicians' description of factors influencing their reporting of suspected child abuse: report of the Child Abuse Reporting Experience Study Research Group. *Pediatrics* 2008;**122**(2):259-66 doi: <http://dx.doi.org/10.1542/peds.2007-2312>[published Online First: Epub Date]].
27. Land M, Barclay L. Nurses' contribution to child protection. *Neonatal, Paediatric and Child Health Nursing* 2008;**11**(1):18-24
28. Phasha TN. The Role of the Teacher in Helping Learners Overcome the Negative Impact of Child Sexual Abuse A South African Perspective. *School Psychology International* 2008;**29**(3):303-27 doi: 10.1177/0143034308093671[published Online First: Epub Date]].

29. Tingberg B, Bredlöv B, Ygge B-M. Nurses' experience in clinical encounters with children experiencing abuse and their parents. *Journal of Clinical Nursing* 2008;**17**(20):2718-24 doi: 10.1111/j.1365-2702.2008.02353.x[published Online First: Epub Date]].
30. McLaren H. Exploring the Ethics of Forewarning: Social Workers, Confidentiality and Potential Child Abuse Disclosures. *Ethics and Social Welfare* 2007;**1**(1):22-40 doi: 10.1080/17496530701237159[published Online First: Epub Date]].
31. Silva MAI, Ferriani C. Domestic violence: from the visible to the invisible. *Revista Latino-Americana de Enfermagem* 2007;**15**(2):275-81
32. VanBergeijk EO, Sarmiento TL. The consequences of reporting child maltreatment: Are school personnel at risk for secondary traumatic stress? *Brief Treatment and Crisis Intervention* 2006;**6**(1):79-98 doi: <http://dx.doi.org/10.1093/brief-treatment/mhj003>[published Online First: Epub Date]].
33. Feng J, Jezewski MA, Hsu T. The meaning of child abuse for nurses in Taiwan. *Journal of Transcultural Nursing* 2005;**16**(2):142-49 8p
34. Shalhoub-Kevorkian N. Disclosure of Child Abuse in Conflict Areas. *Violence Against Women* 2005;**11**(10):1263-91 doi: <http://dx.doi.org/10.1177/1077801205280180>[published Online First: Epub Date]].
35. VanBergeijk E, Sarmiento T. On the Border of Disorder: School Personnel's Experiences Reporting Child Abuse on the U.S.-Mexico Border. *Brief Treatment and Crisis Intervention* 2005;**5**(2):159-85 doi: <http://dx.doi.org/10.1093/brief-treatment/mhi015>[published Online First: Epub Date]].
36. Nayda R. Influences on registered nurses' decision-making in cases of suspected child abuse. *Child Abuse Review* 2002;**11**(3):168-78 doi: <http://dx.doi.org/10.1002/car.736>[published Online First: Epub Date]].
37. Waugh F, Bonner M. Domestic violence and child protection: Issues in safety planning. *Child Abuse Review* 2002;**11**(5):282-95 doi: <http://dx.doi.org/10.1002/car.758>[published Online First: Epub Date]].
38. Deisz R, Doueck HJ, George N. Reasonable cause: a qualitative study of mandated reporting. *Child Abuse & Neglect* 1996;**20**(4):275-87
39. Anderson E, Levine M, Sharma A, Ferretti L, Steinberg K, Wallach L. Coercive uses of mandatory reporting in therapeutic relationships. *Behavioral Sciences and the Law* 1993;**11**(3):335-45
40. Tite R. How teachers define and respond to child abuse: the distinction between theoretical and reportable cases. *Child Abuse & Neglect* 1993;**17**(5):591-603
41. Anderson E, Steinberg K, Ferretti L, Levine M, Sharma A, Wallach L. Consequences and dilemmas in therapeutic relationships with families resulting from mandatory reporting legislation. *Law & Policy* 1992;**14**(2-3):241-56
42. Giovannoni JM. Unsubstantiated reports: Perspectives of child protection workers. *Child & Youth Services* 1991;**15**(2):51-62 doi: [http://dx.doi.org/10.1300/J024v15n02\\_03](http://dx.doi.org/10.1300/J024v15n02_03)[published Online First: Epub Date]].
43. Barksdale C. Child abuse reporting: A clinical dilemma? *Smith College Studies in Social Work* 1989;**59**(2):170-82 doi: <http://dx.doi.org/10.1080/00377318909516657>[published Online First: Epub Date]].
44. Muehleman T, Kimmons C. Psychologists' views on child abuse reporting, confidentiality, life, and the law: an exploratory study. *Prof Psychol* 1981;**12**(5):631-8
